# Supplementary material for: Bioactive Cembranoids from the South China Sea Soft Coral Sarcophyton elegans
Source: PubMed Central journal article supplement (PMC6331945; doi:10.3390/molecules200713324), 2015-07-22
Supplement: molecules-20-13324-s001.pdf [file molecules-20-13324-s001.pdf]

# Supplementary Materials

## Contents:

- Figure S1.**  $^1\text{H}$  NMR (400 MHz,  $\text{CD}_3\text{OD}$ ) spectrum of sarcophelegan A (**1**).
- Figure S2.**  $^{13}\text{C}$  NMR (100 MHz,  $\text{CD}_3\text{OD}$ ) spectrum of sarcophelegan A (**1**).
- Figure S3.**  $^1\text{H}$ - $^1\text{H}$  COSY spectrum of sarcophelegan A (**1**) in  $\text{CD}_3\text{OD}$ .
- Figure S4.** HSQC spectrum of sarcophelegan A (**1**) in  $\text{CD}_3\text{OD}$ .
- Figure S5.** HMBC spectrum of sarcophelegan A (**1**) in  $\text{CD}_3\text{OD}$ .
- Figure S6.** NOESY spectrum of sarcophelegan A (**1**) in  $\text{CD}_3\text{OD}$ .
- Figure S7.**  $^1\text{H}$  NMR (400 MHz,  $\text{CD}_3\text{OD}$ ) spectrum of sarcophelegan B (**2**).
- Figure S8.**  $^{13}\text{C}$  NMR (100 MHz,  $\text{CD}_3\text{OD}$ ) spectrum of sarcophelegan B (**2**).
- Figure S9.**  $^1\text{H}$ - $^1\text{H}$  COSY spectrum of sarcophelegan B (**2**) in  $\text{CD}_3\text{OD}$ .
- Figure S10.** HSQC spectrum of sarcophelegan B (**2**) in  $\text{CD}_3\text{OD}$ .
- Figure S11.** HMBC spectrum of sarcophelegan B (**2**) in  $\text{CD}_3\text{OD}$ .
- Figure S12.** NOESY spectrum of sarcophelegan B (**2**) in  $\text{CD}_3\text{OD}$ .
- Figure S13.**  $^1\text{H}$  NMR (400 MHz,  $\text{CD}_3\text{OD}$ ) spectrum of sarcophelegan C (**3**).
- Figure S14.**  $^{13}\text{C}$  NMR (100 MHz,  $\text{CD}_3\text{OD}$ ) spectrum of sarcophelegan C (**3**).
- Figure S15.**  $^1\text{H}$ - $^1\text{H}$  COSY spectrum of sarcophelegan C (**3**) in  $\text{CD}_3\text{OD}$ .
- Figure S16.** HSQC spectrum of sarcophelegan C (**3**) in  $\text{CD}_3\text{OD}$ .
- Figure S17.** HMBC spectrum of sarcophelegan C (**3**) in  $\text{CD}_3\text{OD}$ .
- Figure S18.** NOESY spectrum of sarcophelegan C (**3**) in  $\text{CD}_3\text{OD}$ .
- Figure S19.**  $^1\text{H}$  NMR (400 MHz,  $\text{CDCl}_3$ ) spectrum of sarcophelegan D (**4**).
- Figure S20.**  $^{13}\text{C}$  NMR (100 MHz,  $\text{CDCl}_3$ ) spectrum of sarcophelegan D (**4**).
- Figure S21.**  $^1\text{H}$ - $^1\text{H}$  COSY spectrum of sarcophelegan D (**4**) in  $\text{CDCl}_3$ .
- Figure S22.** HSQC spectrum of sarcophelegan D (**4**) in  $\text{CDCl}_3$ .
- Figure S23.** HMBC spectrum of sarcophelegan D (**4**) in  $\text{CDCl}_3$ .
- Figure S24.** NOESY spectrum of sarcophelegan D (**4**) in  $\text{CDCl}_3$ .
- Figure S25.** The Chem3D molecular modeling study of **3**.

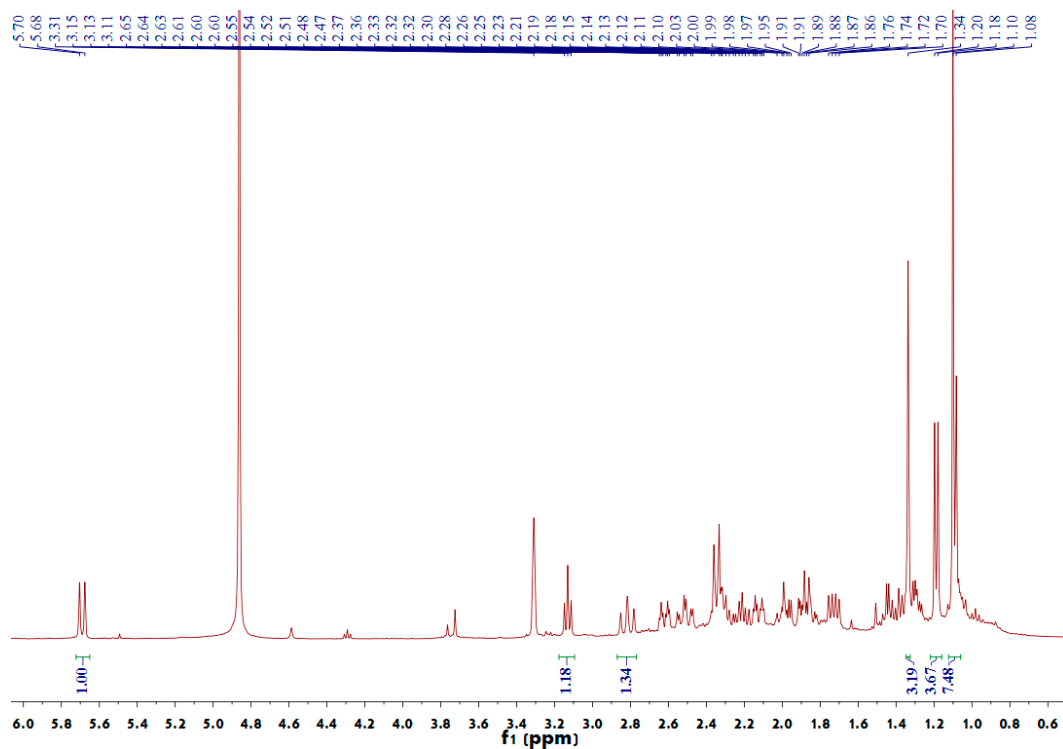

Figure S1.  $^1\text{H}$  NMR (400 MHz,  $\text{CD}_3\text{OD}$ ) spectrum of sarcophelegan A (1).

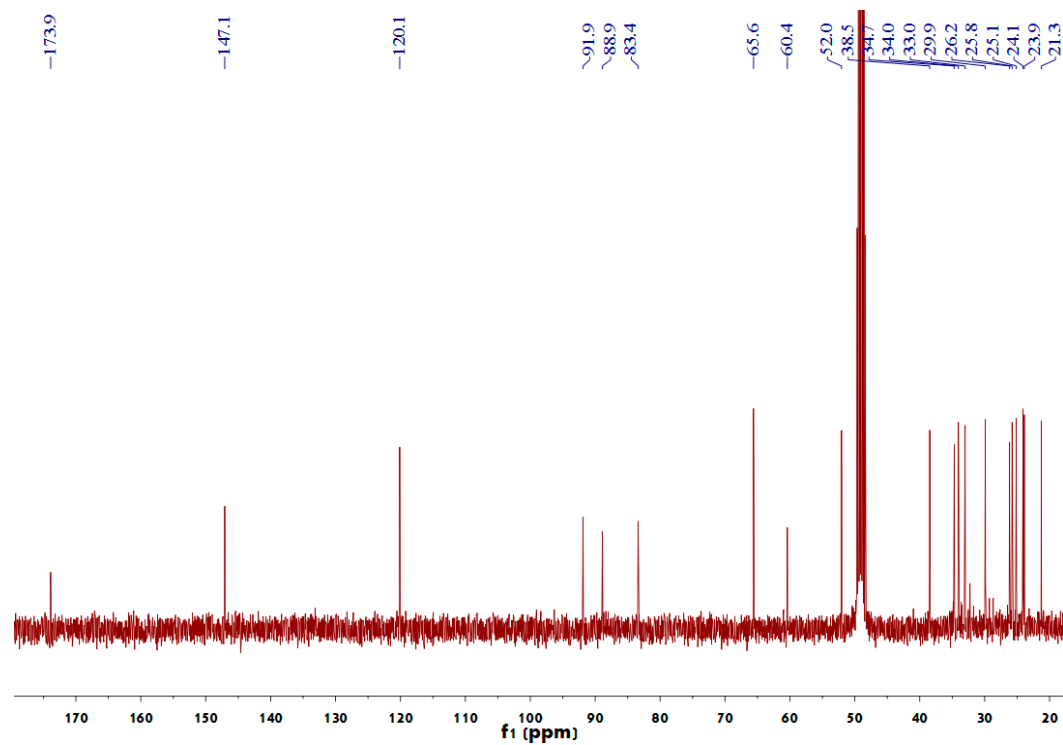

Figure S2.  $^{13}\text{C}$  NMR (100 MHz, MeOD) spectrum of sarcophelegan A (1).

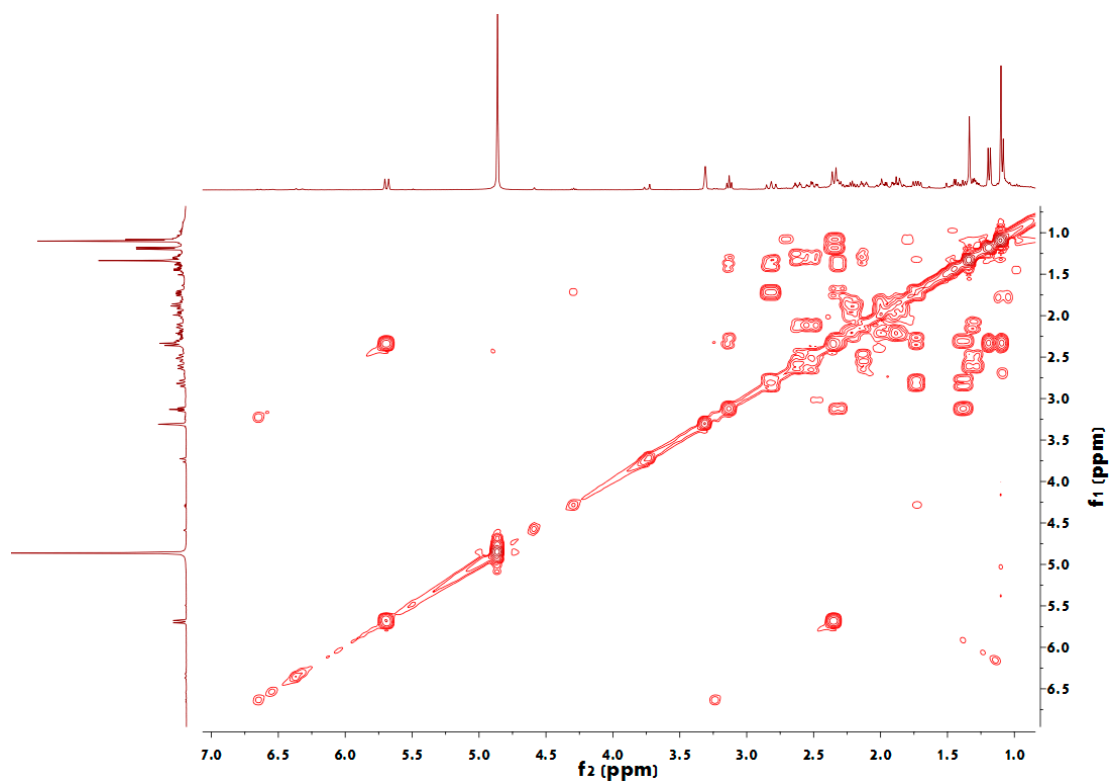

**Figure S3.**  $^1\text{H}$ - $^1\text{H}$  COSY spectrum of sarcophelegan A (**1**) in  $\text{CD}_3\text{OD}$ .

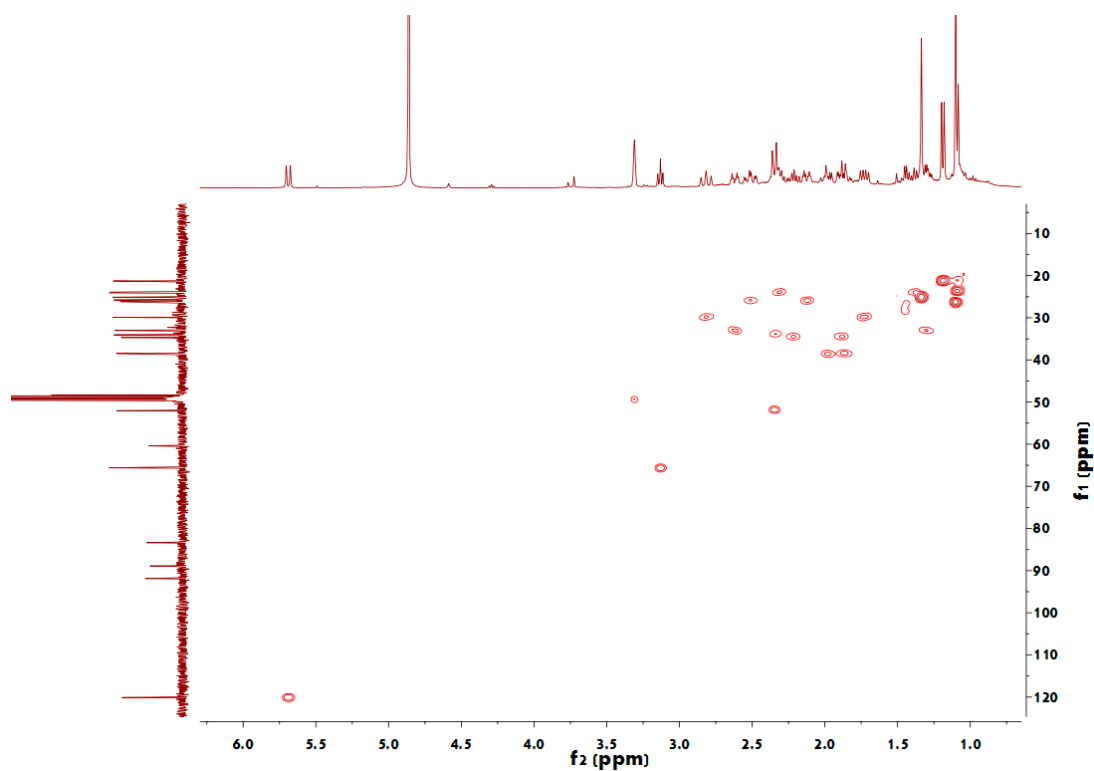

**Figure S4.** HSQC spectrum of sarcophelegan A (**1**) in  $\text{CD}_3\text{OD}$ .

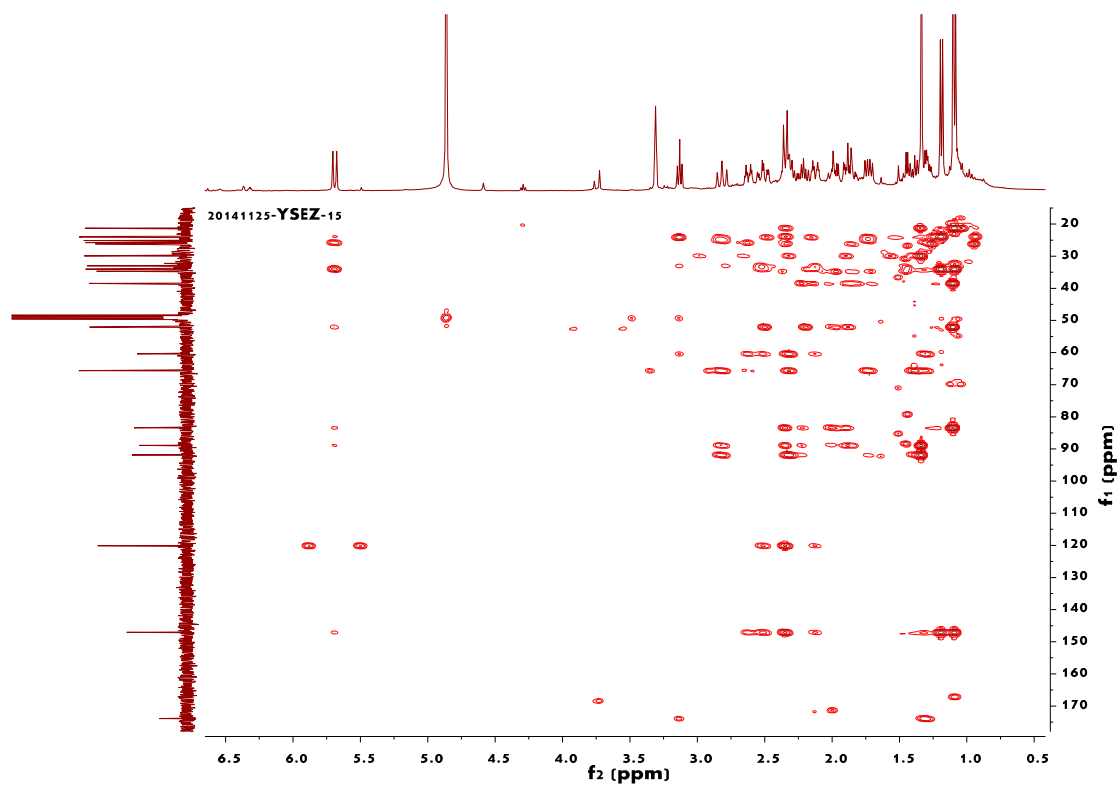

Figure S5. HMBC spectrum of sarcophelegan A (1) in  $\text{CD}_3\text{OD}$ .

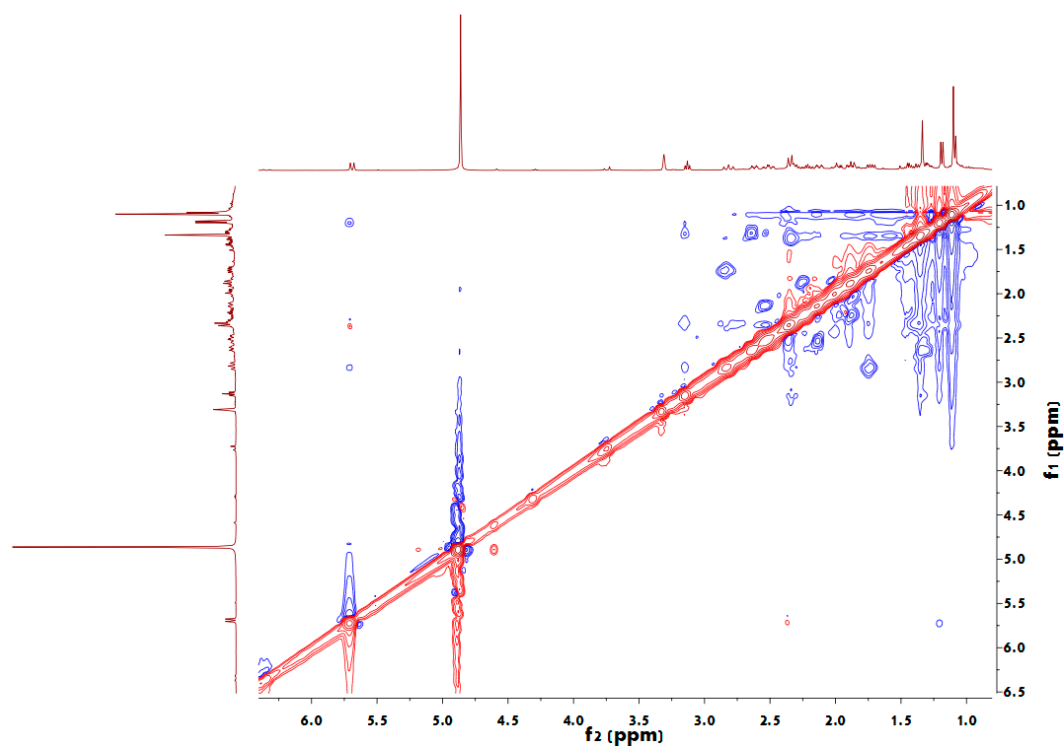

Figure S6. NOESY spectrum of sarcophelegan A (1) in  $\text{CD}_3\text{OD}$ .

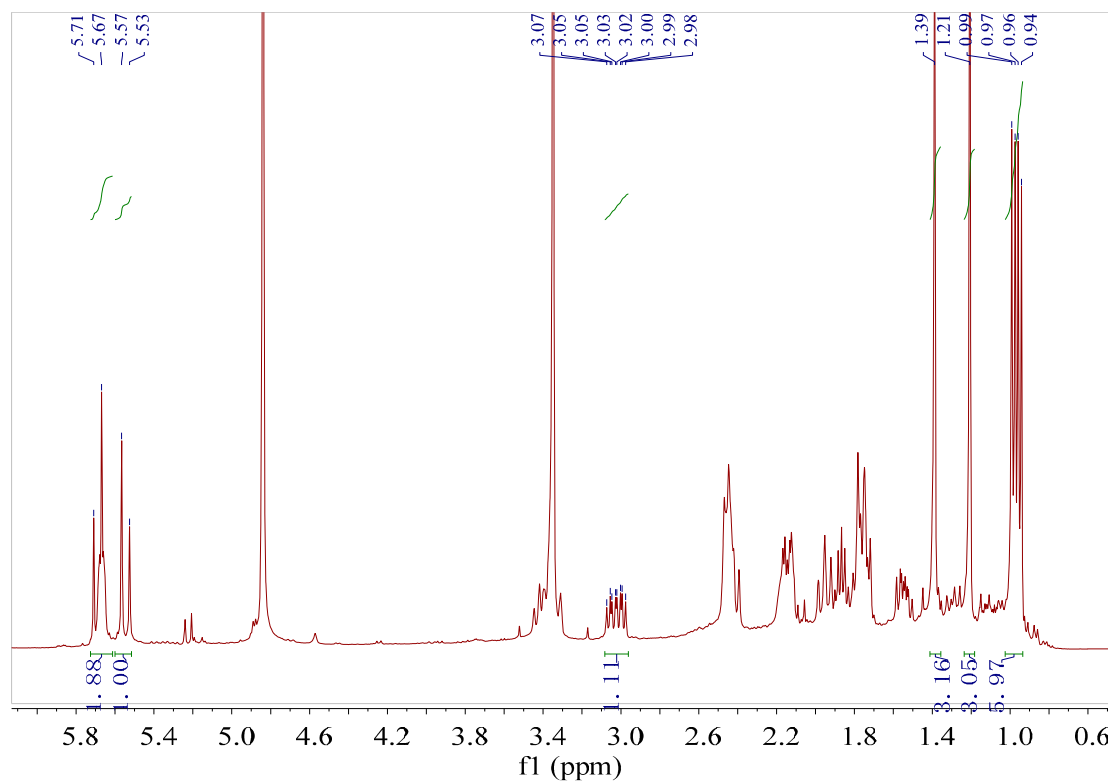

**Figure S7.**  $^1\text{H}$  NMR (400 MHz,  $\text{CD}_3\text{OD}$ ) spectrum of sarcophelegan B (**2**).

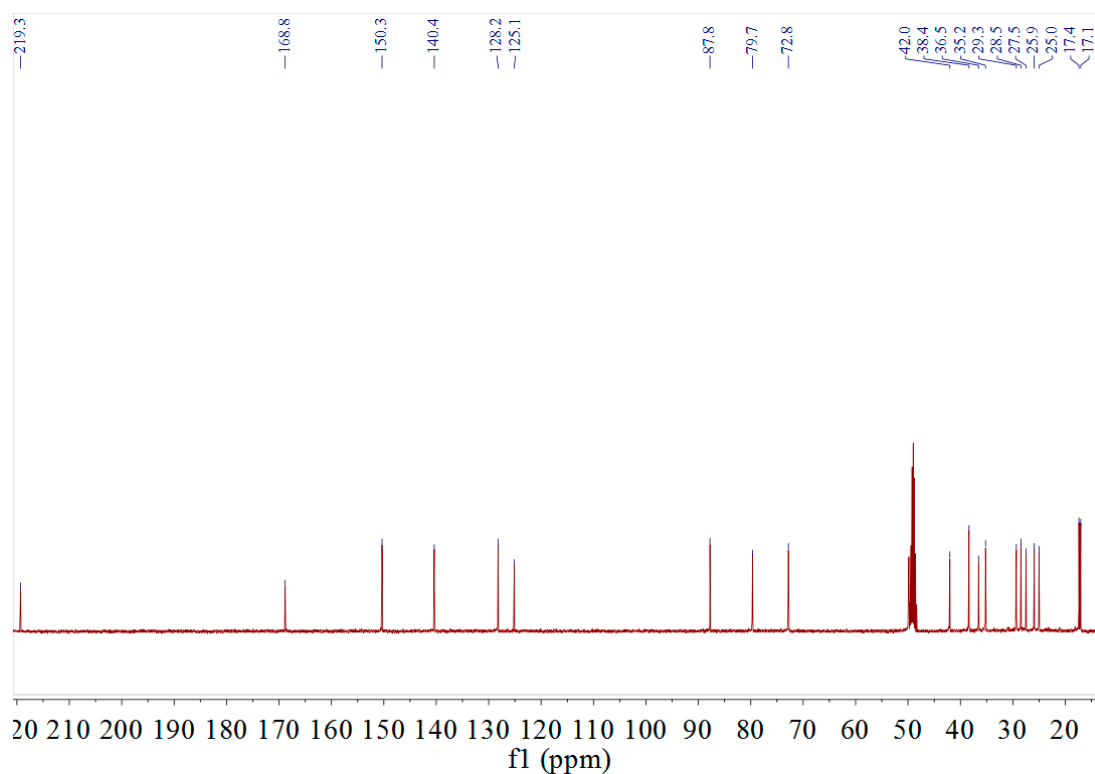

**Figure S8.**  $^{13}\text{C}$  NMR (100 MHz,  $\text{CD}_3\text{OD}$ ) spectrum of sarcophelegan B (**2**).

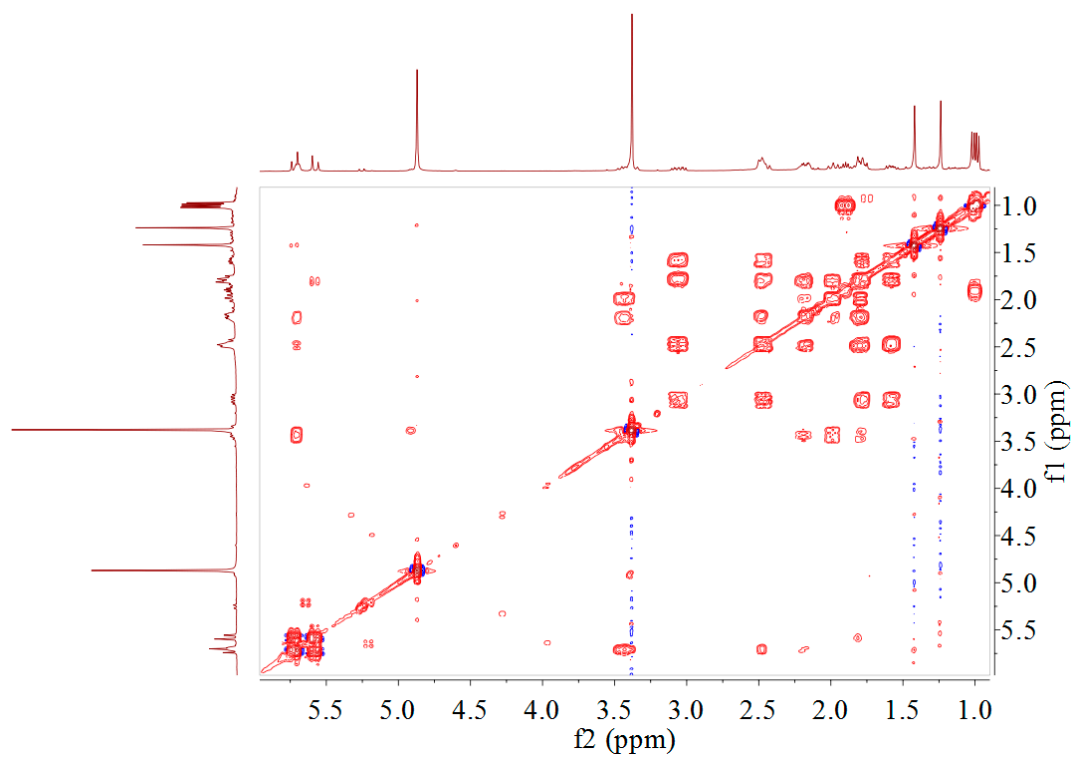

**Figure S9.**  $^1\text{H}$ - $^1\text{H}$  COSY spectrum of sarcophelegan B (**2**) in  $\text{CD}_3\text{OD}$ .

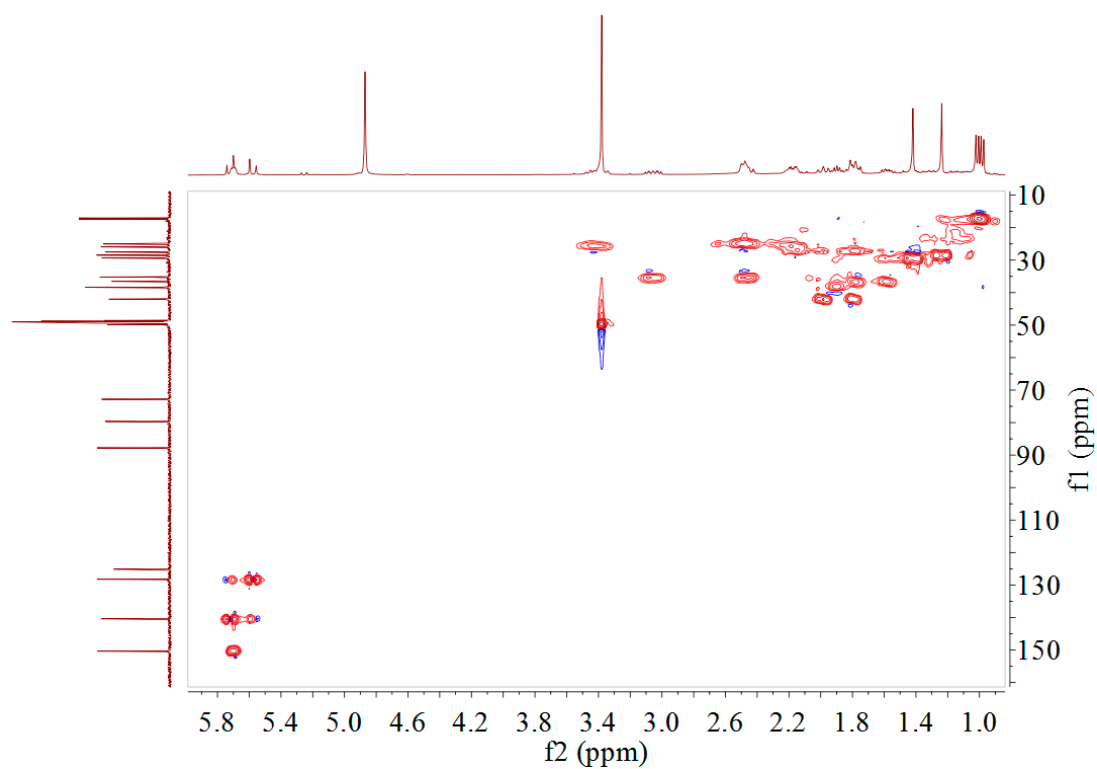

**Figure S10.** HSQC spectrum of sarcophelegan B (**2**) in  $\text{CD}_3\text{OD}$ .

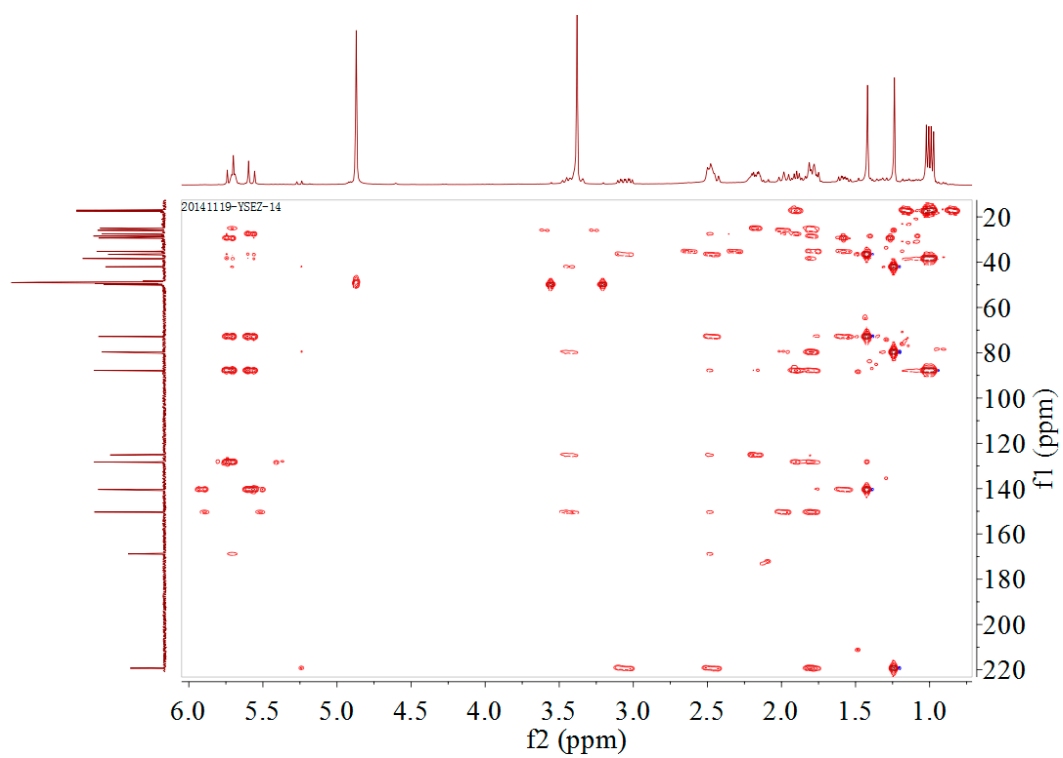

**Figure S11.** HMBC spectrum of sarcophelegan B (**2**) in CD<sub>3</sub>OD.

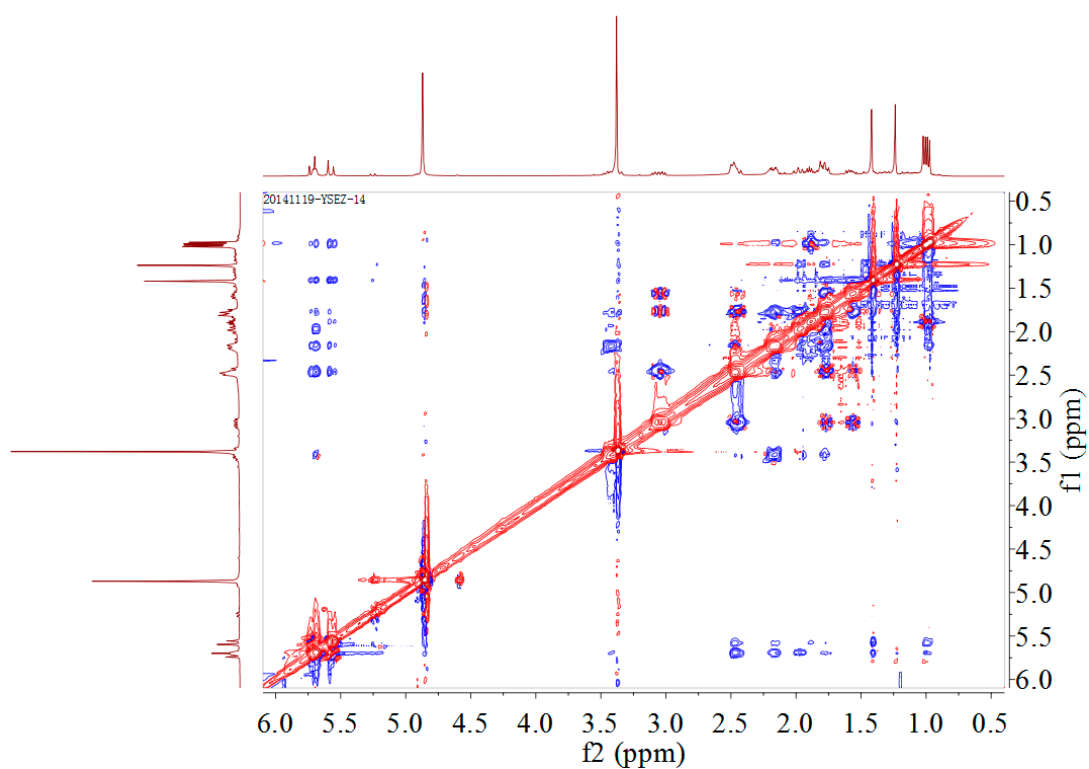

**Figure S12.** NOESY spectrum of sarcophelegan B (**2**) in CD<sub>3</sub>OD.

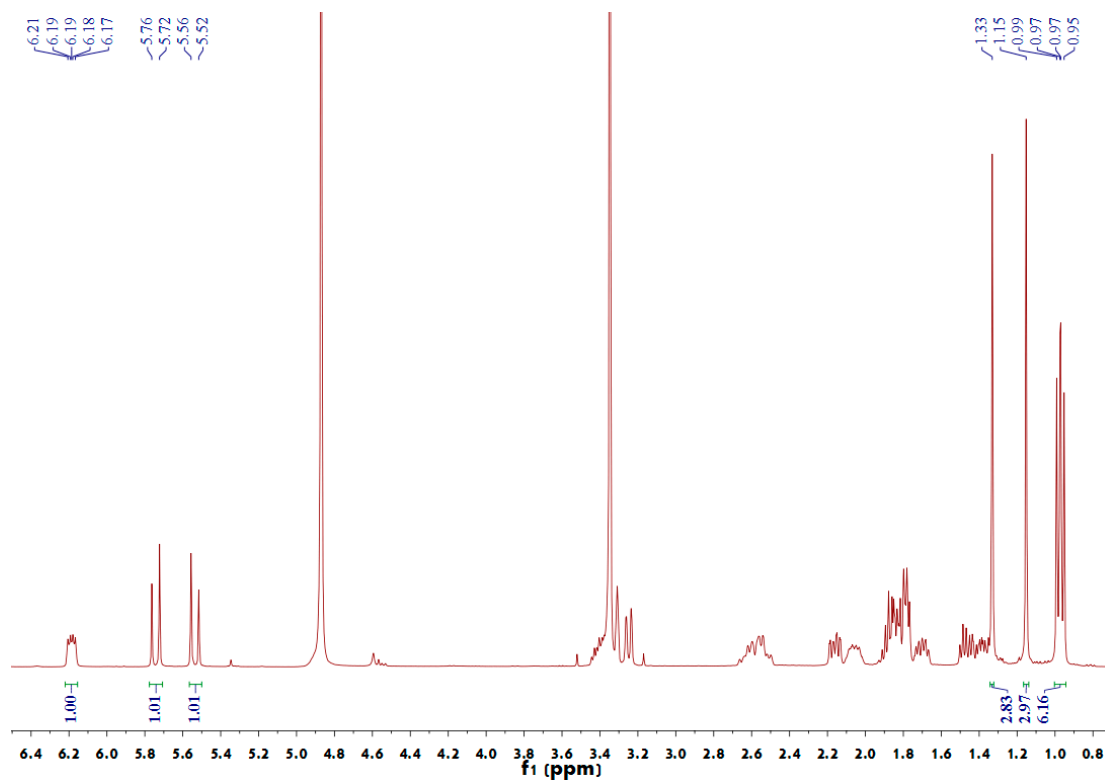

Figure S13. <sup>1</sup>H NMR (400 MHz, CD<sub>3</sub>OD) spectrum of sarcophelegan C (3).

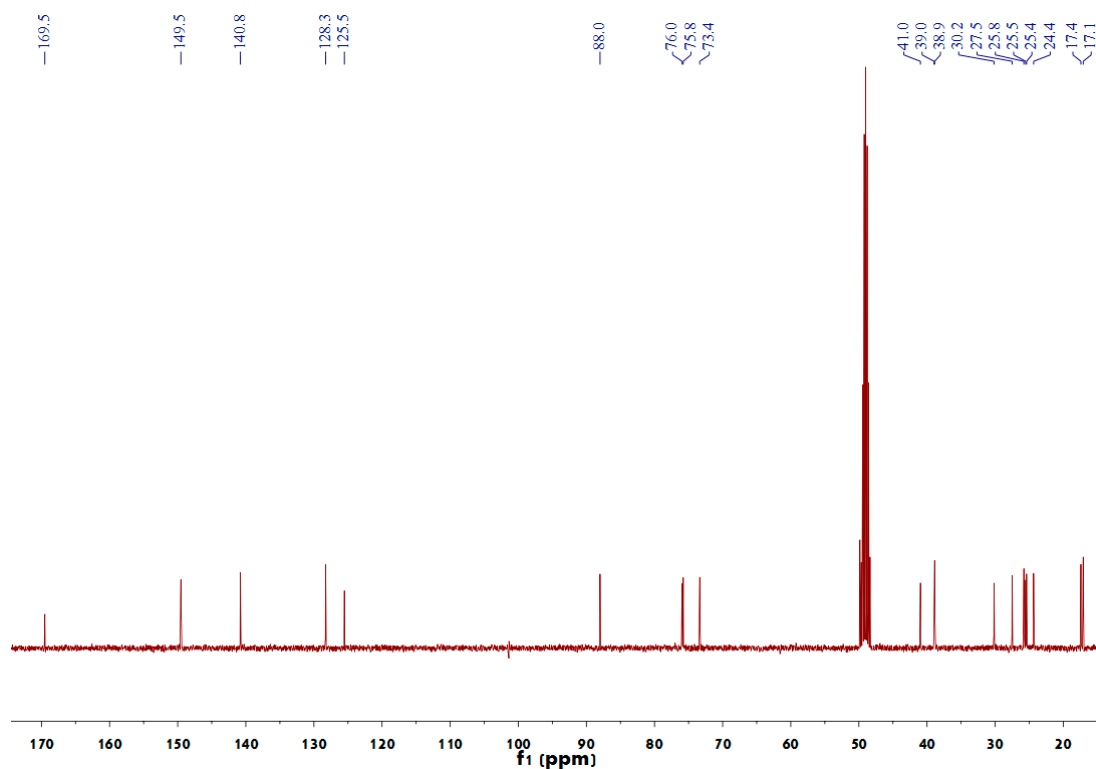

Figure S14. <sup>13</sup>C NMR (100 MHz, CD<sub>3</sub>OD) spectrum of sarcophelegan C (3).



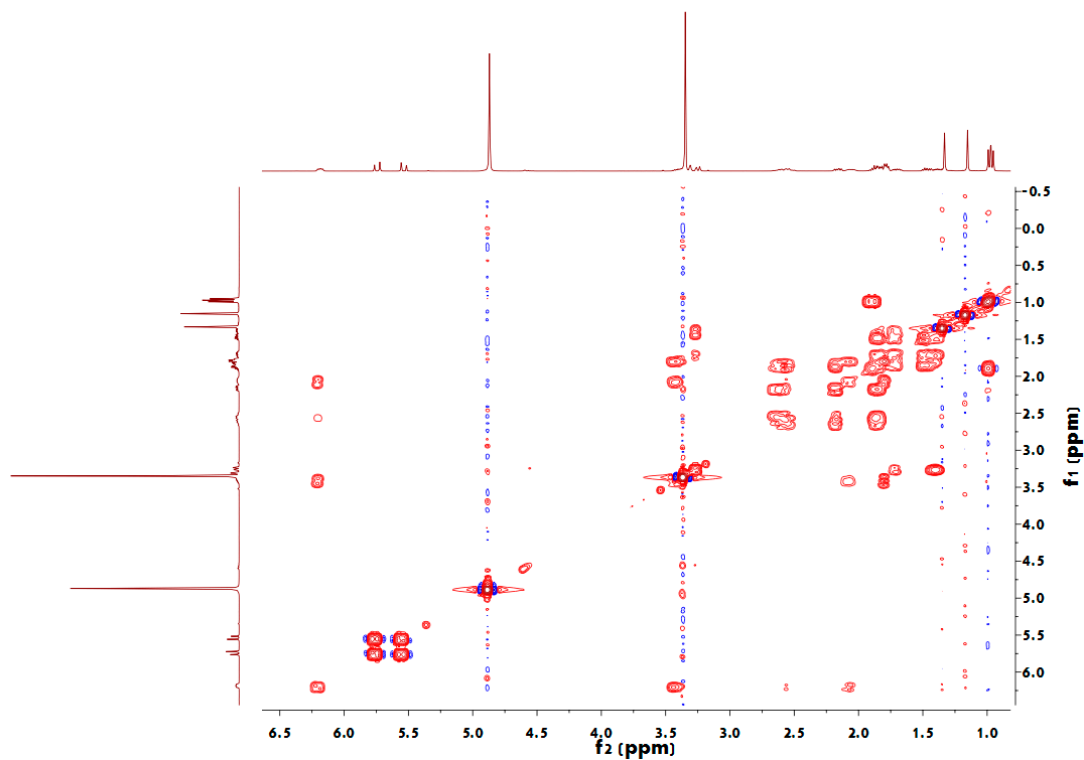

Figure S15.  $^1\text{H}$ - $^1\text{H}$  COSY spectrum of sarcophelegan C (**3**) in  $\text{CD}_3\text{OD}$ .

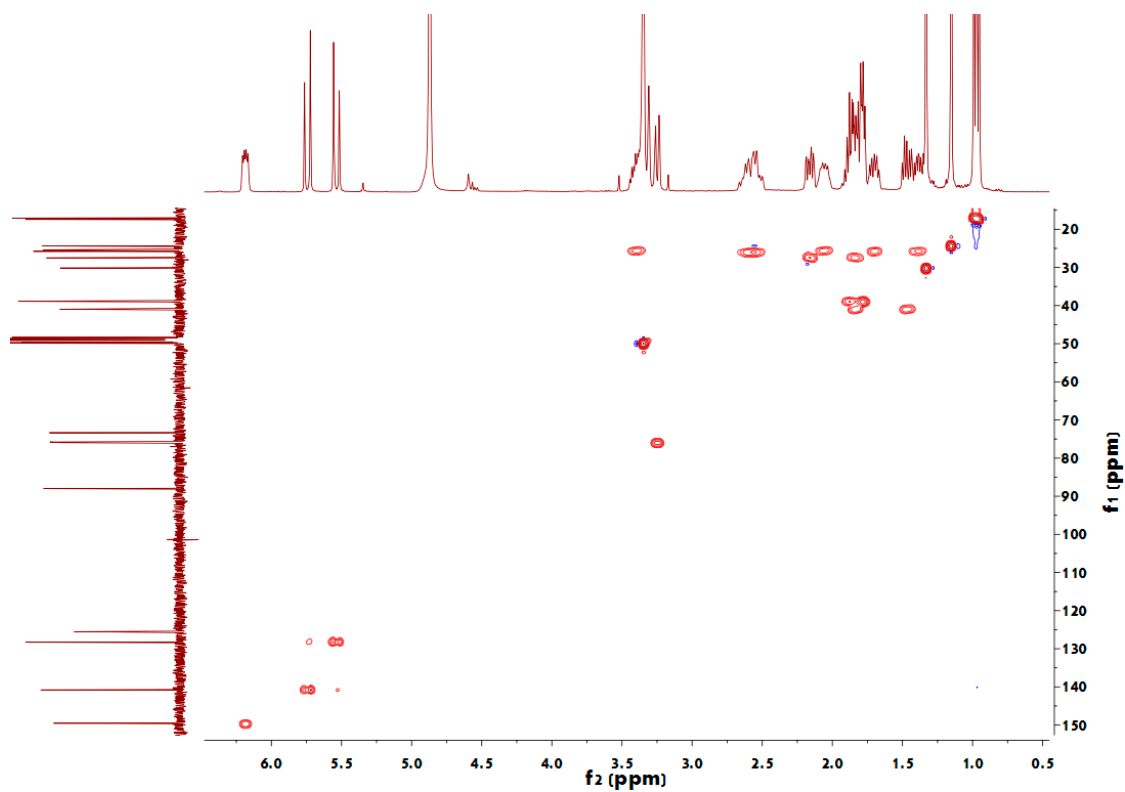

Figure S16. HSQC spectrum of sarcophelegan C (**3**) in  $\text{CD}_3\text{OD}$ .

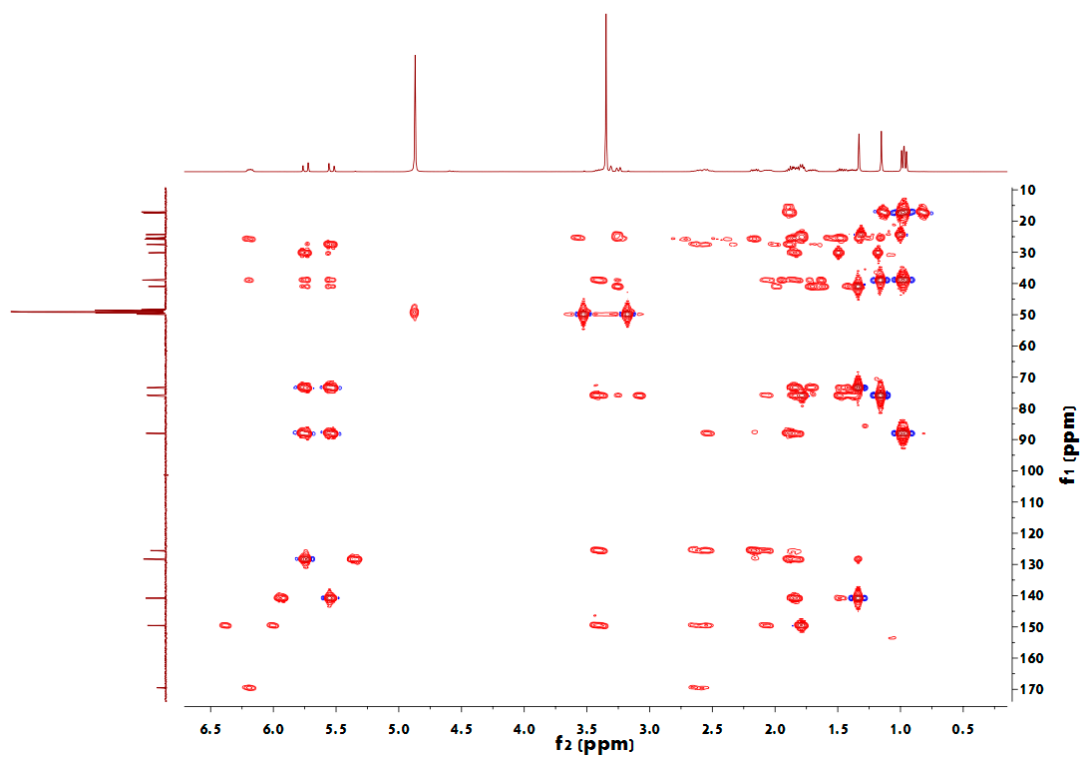

Figure S17. HMBC spectrum of sarcophelegan C (**3**) in  $\text{CD}_3\text{OD}$ .

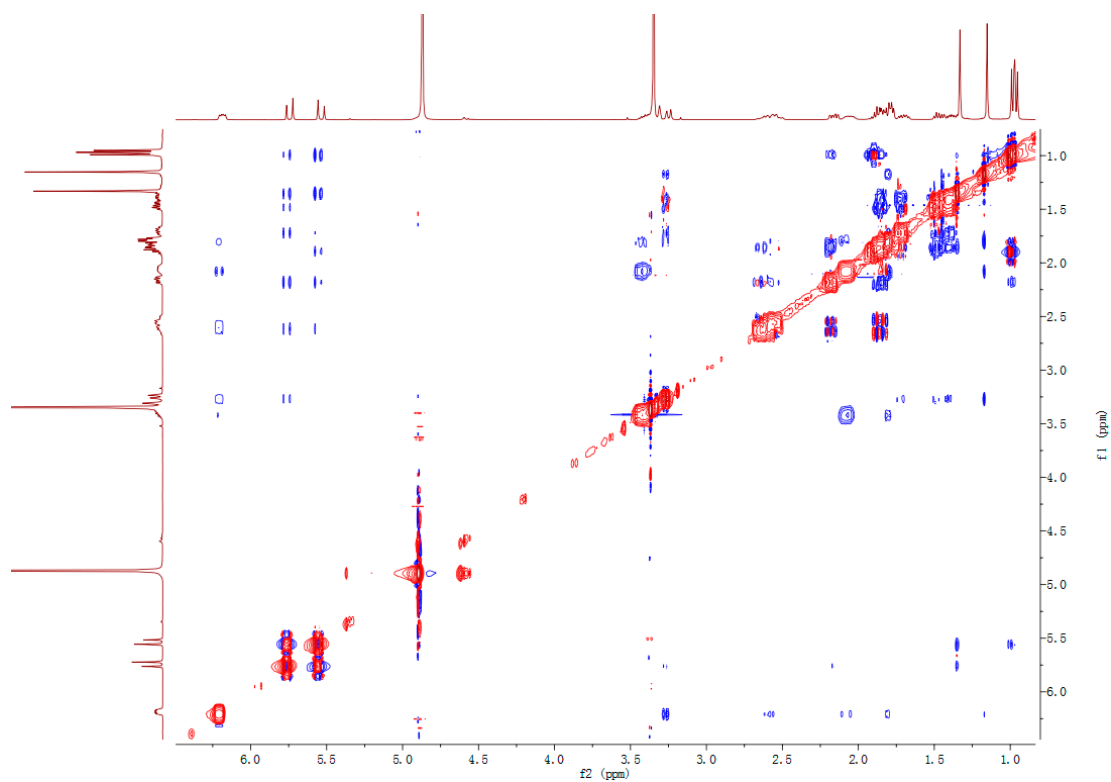

Figure S18. NOESY spectrum of sarcophelegan C (**3**) in  $\text{CD}_3\text{OD}$ .

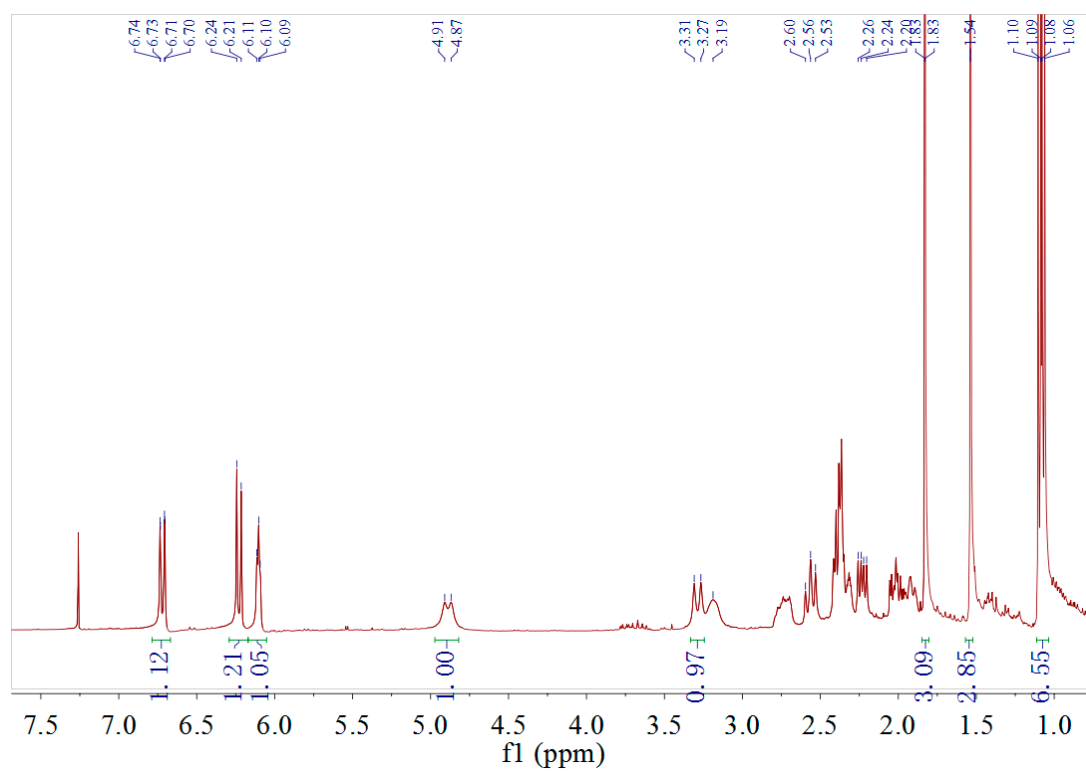

**Figure S19.** <sup>1</sup>H NMR (400 MHz, CDCl<sub>3</sub>) spectrum of sarcophelegan D (4).

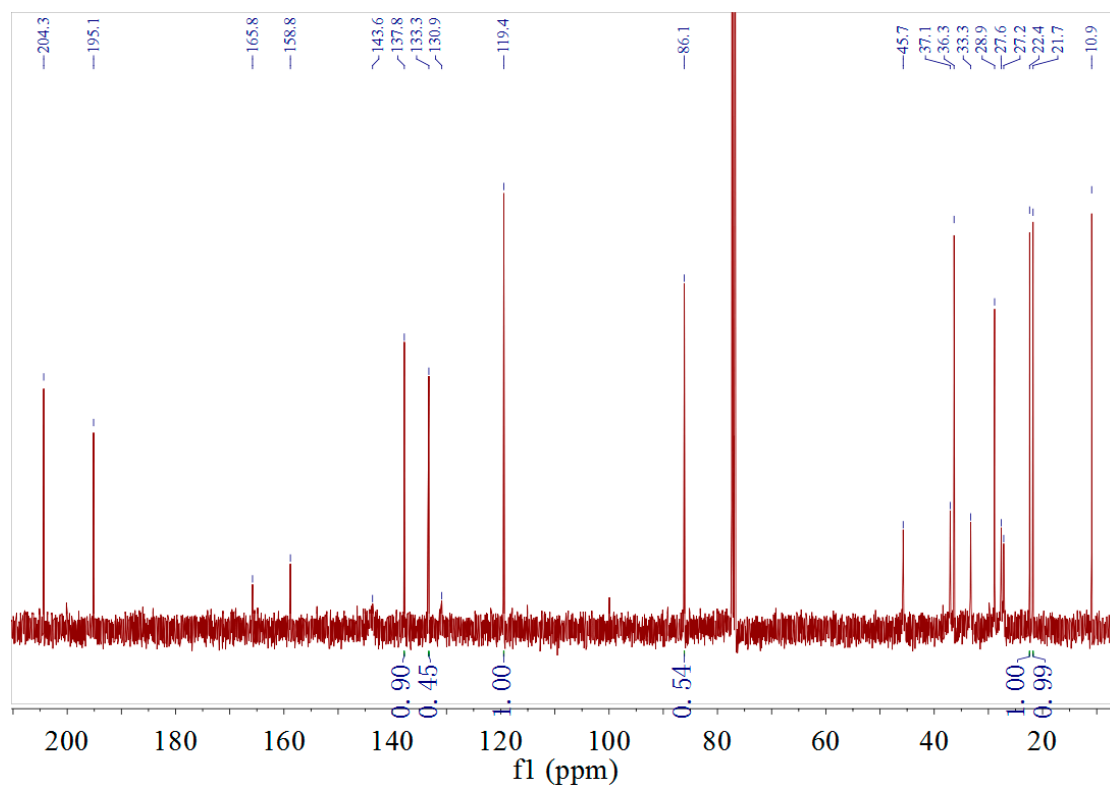

**Figure S20.** <sup>13</sup>C NMR (100 MHz, CDCl<sub>3</sub>) spectrum of sarcophelegan D (4).

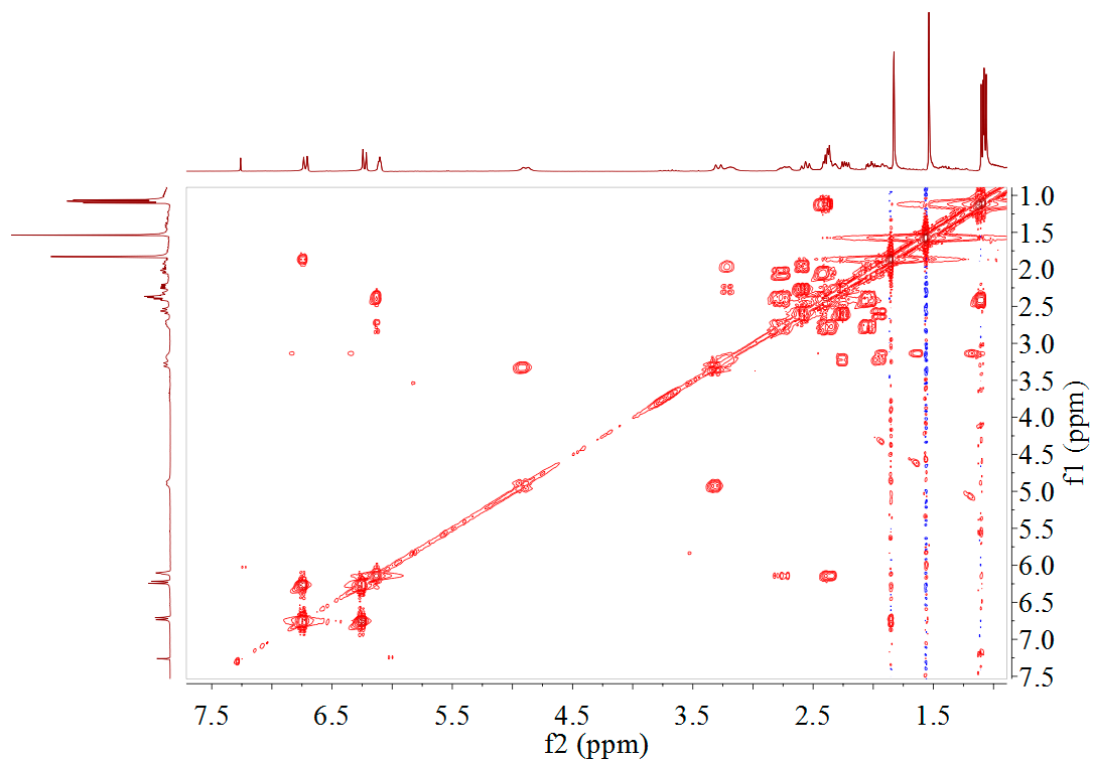

**Figure S21.**  $^1\text{H}$ - $^1\text{H}$  COSY spectrum of sarcophelegan D (**4**) in  $\text{CDCl}_3$ .

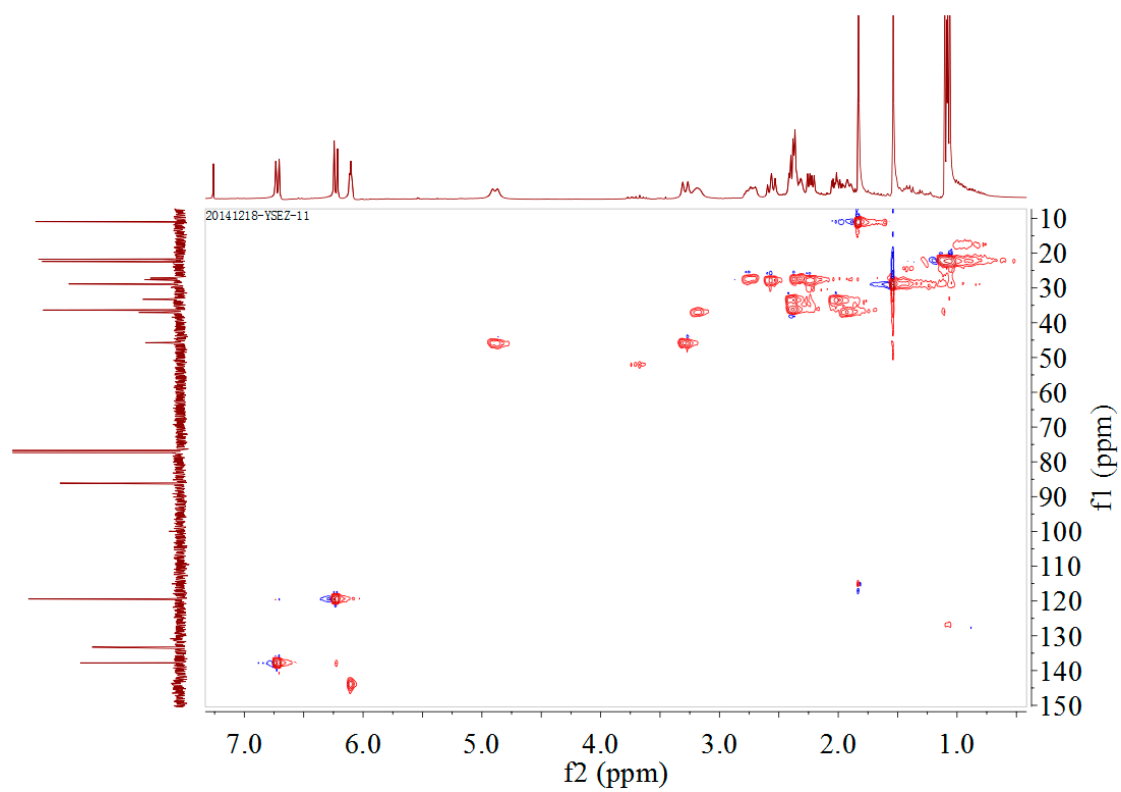

**Figure S22.** HSQC spectrum of sarcophelegan D (**4**) in  $\text{CDCl}_3$ .

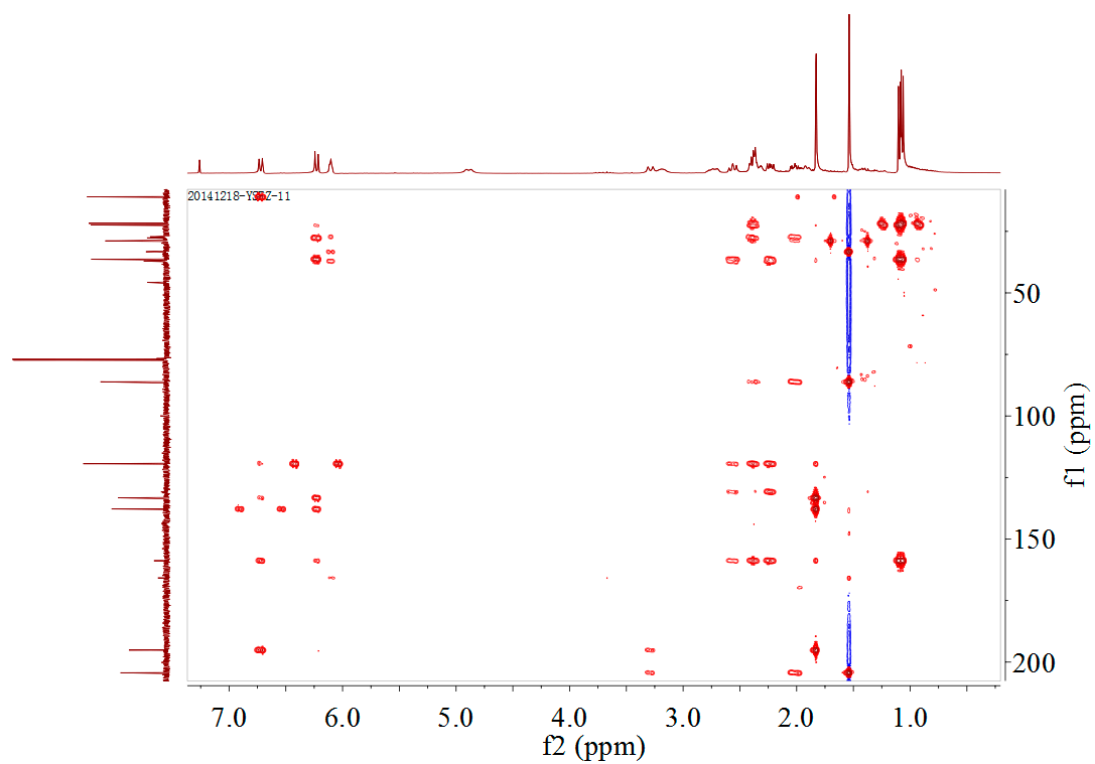

**Figure S23.** HMBC spectrum of sarcophelegan D (**4**) in CDCl<sub>3</sub>.

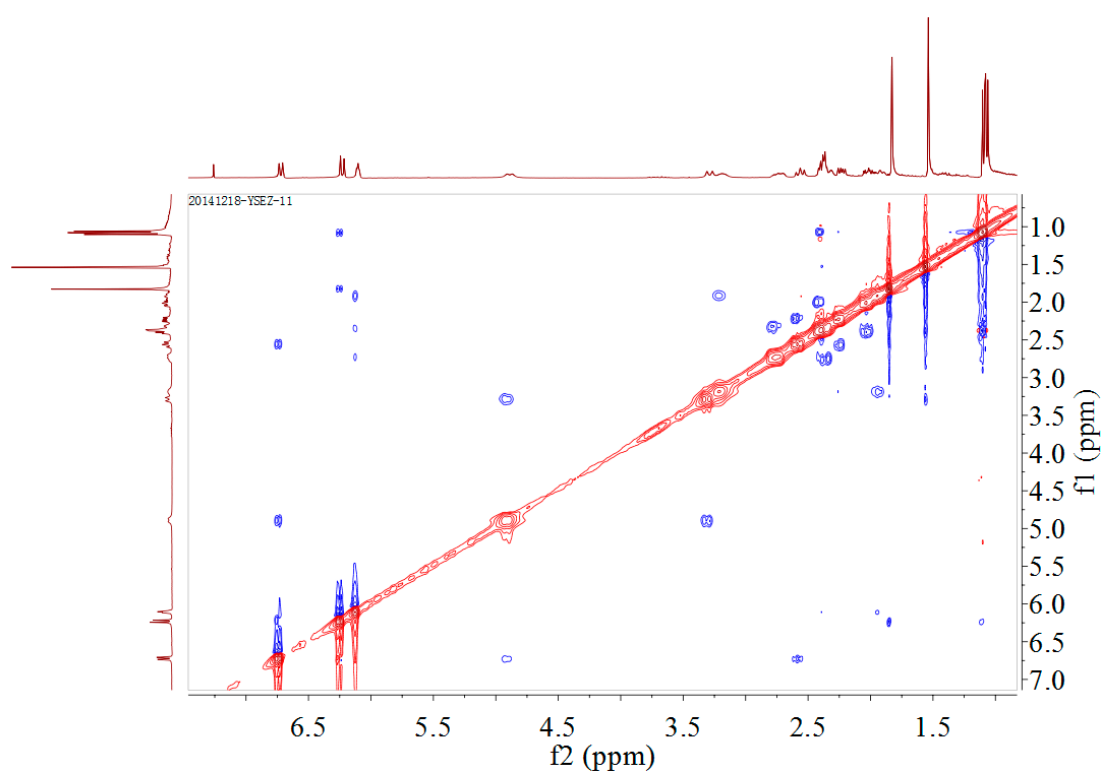

**Figure S24.** NOESY spectrum of sarcophelegan D (**4**) in CDCl<sub>3</sub>.

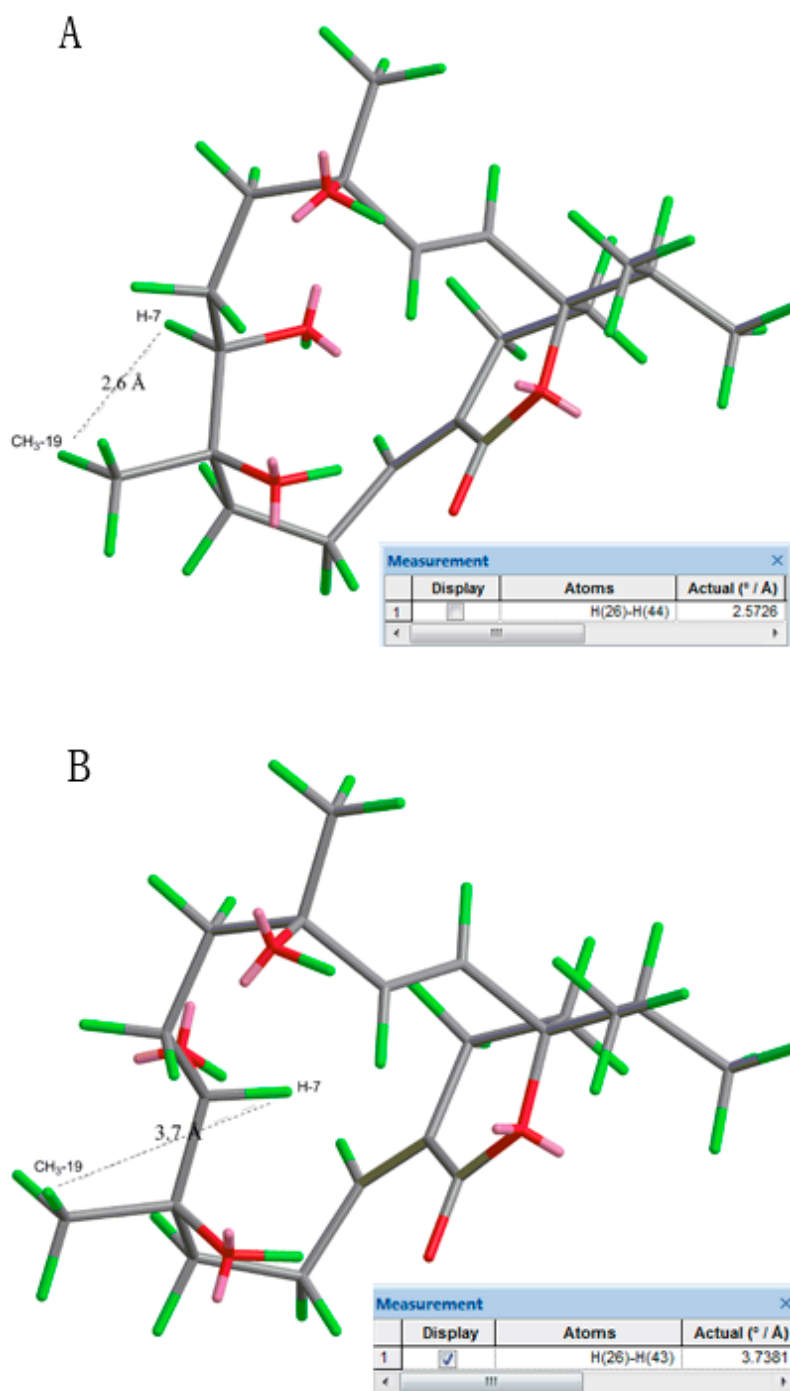

**Figure S25.** The Chem3D molecular modeling study of **3**. (A) represents the distance between H-7 and CH<sub>3</sub>-19 of 7 $\beta$ -OH isomer; (B) represents the distance between H-7 and CH<sub>3</sub>-19 of 7 $\alpha$ -OH isomer.
